# Supplementary material
Source: PubMed Central journal article supplement (PMC8595694)
Supplement: NIHMS1741128-supplement-1.pdf [file NIHMS1741128-supplement-1.pdf]

## Supplementary Figure 1

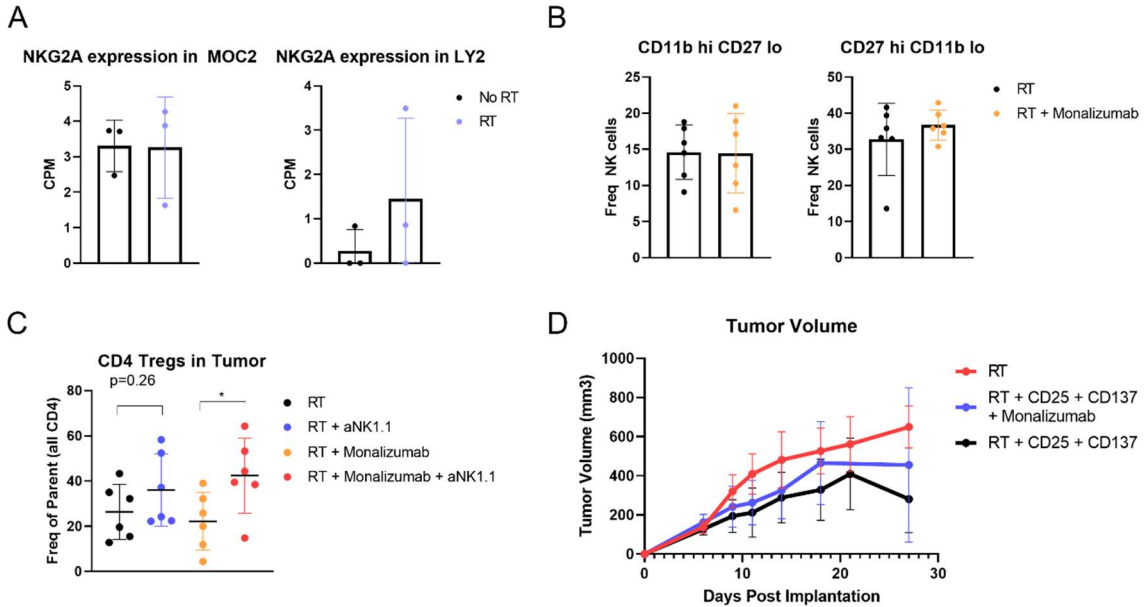

## Supplementary Figure 1

(A) Flow cytometry analysis of NK cell population expression of NKG2A in MOC2 tumors 3 days after RT; n=3. (B). Flow cytometry analysis of NK cell populations in MOC2 tumors 3 days after RT and anti-NKG2A therapy; n=6. (C) Flow cytometry analysis of CD4 T cell populations in MOC2 tumors 3 days after RT, anti-NKG2A therapy and NK cell depletion with NK1.1 antibody; n=6. (D) MOC2 tumor volumes of C57BL/6 mice treated with RT and isotype control (red line), anti-CD137, anti-CD25, and anti-NKG2A (blue line), anti-CD17 and anti-CD25 (black line); n=7.
