# Supplementary material
Source: PubMed Central journal article supplement (PMC8595694)
Supplement: NIHMS1741128-supplement-3.pdf [file NIHMS1741128-supplement-3.pdf]

Supplementary Figure 3

A

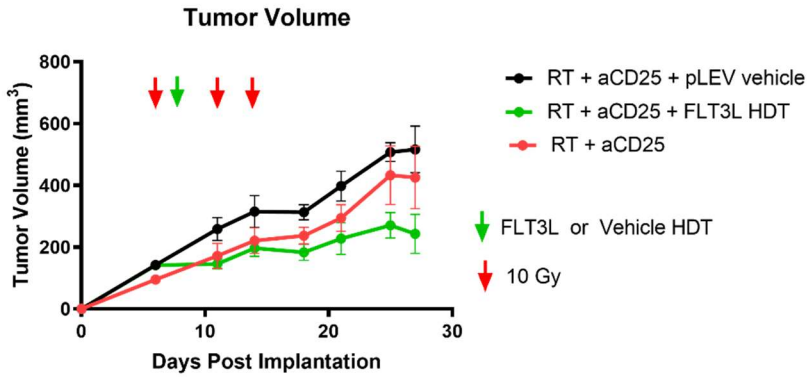

B

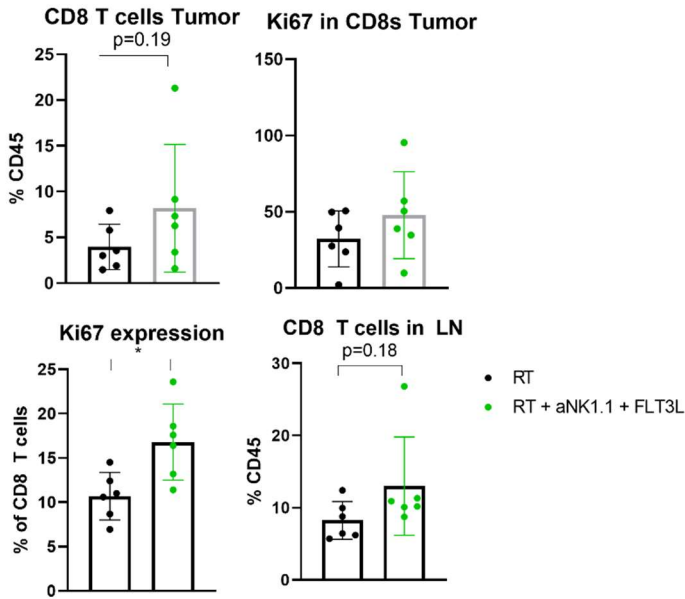

Supplementary Figure 3

(A) MOC2 tumor volumes of mice treated with RT, anti-CD25, and pLEV vehicle control (black line); RT, anti-CD25, and pLEV FLT3L plasmid (green line), and RT + anti-CD25 (red line). n=7. (B) Flow Cytometry analysis of CD8 T cell populations in MOC2 tumors and lymph nodes (LN) of C57 BL/6 mice. MOC2 tumors were harvested 3 days after RT, NK cell depletion and FLT3L therapy; n=6.
