# Supplementary material
Source: PubMed Central journal article supplement (PMC8595694)
Supplement: NIHMS1741128-supplement-4.pdf [file NIHMS1741128-supplement-4.pdf]

Supplementary Figure 4

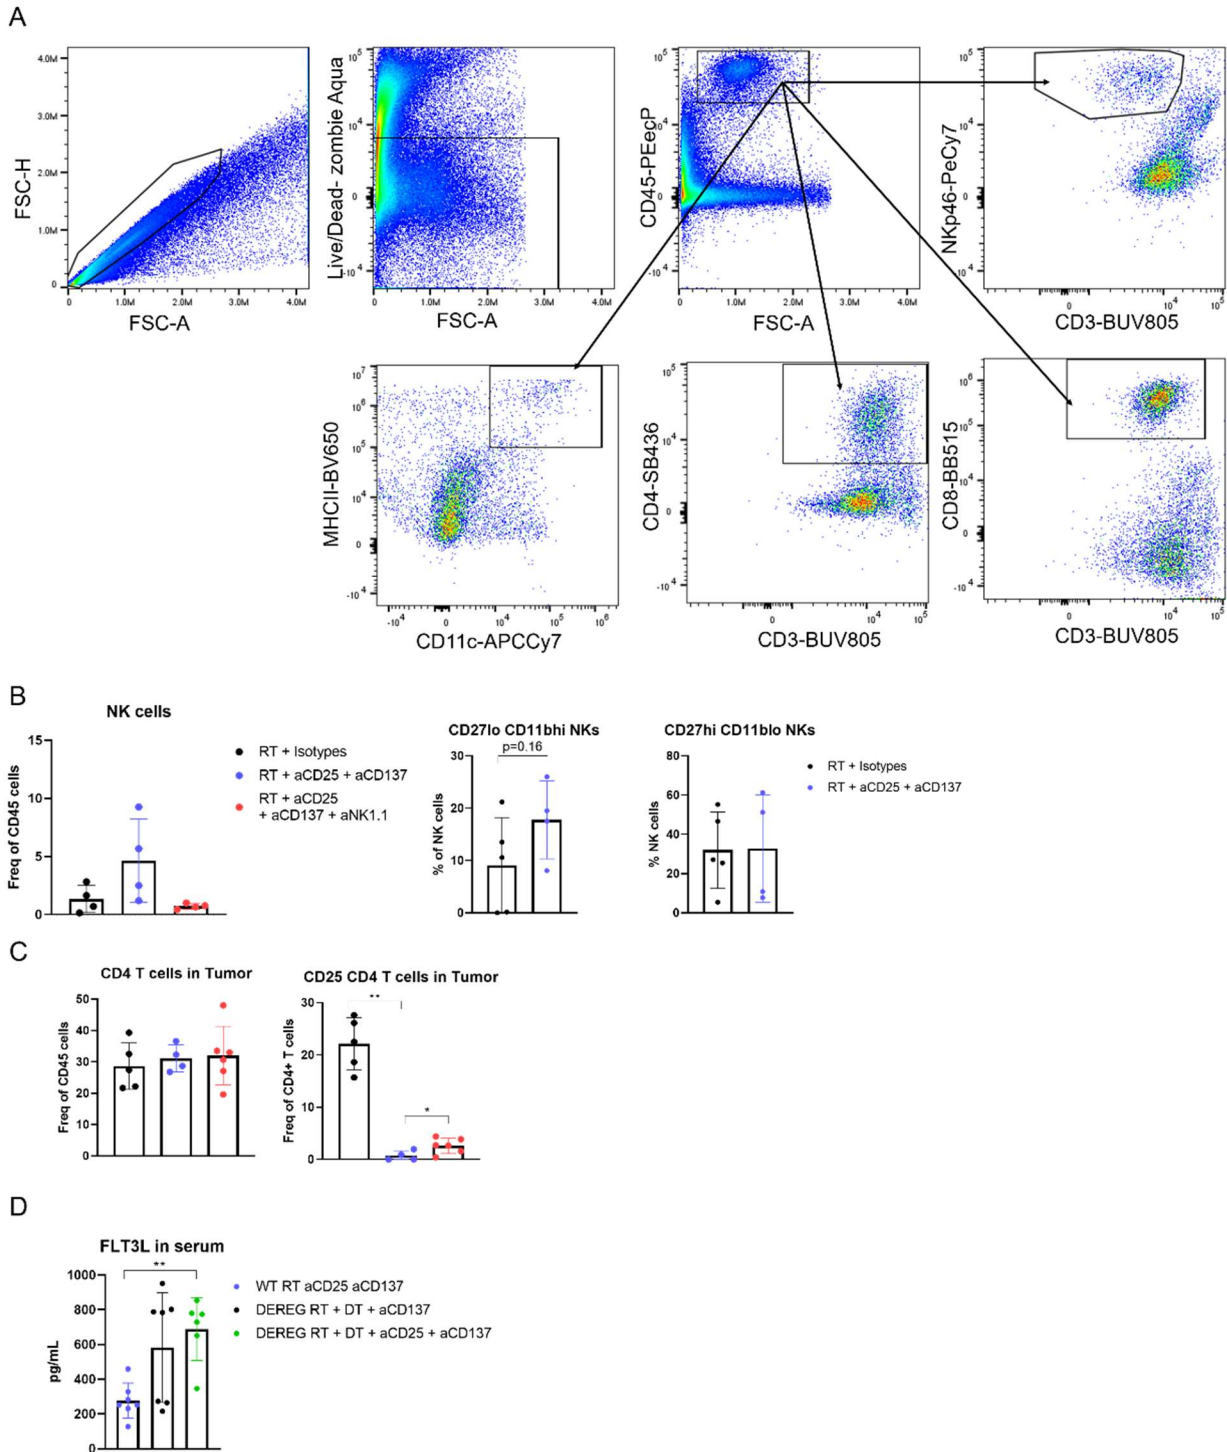

Supplementary Figure 4

(A) Gating strategy used in flow cytometry analysis analyzing NK46<sup>+</sup> CD3<sup>-</sup> NK cells, CD11c<sup>+</sup> MHCII<sup>+</sup> DCs, CD3<sup>+</sup> CD4<sup>+</sup> T cells, and CD3<sup>+</sup> CD8<sup>+</sup> T cells. (B) Flow cytometry analysis of NK

cell populations in blood from WT C57BL/6 mice treated with RT, anti-CD25, and anti-CD137; n=4. (C) Flow cytometry of CD4 T cell populations in tumors from WT C57BL/6 mice treated with RT, anti-CD25, and anti-CD137 and from DEREK mice treated with RT, anti-CD25, anti-CD137, and diphtheria toxin (DT); \* $p \leq 0.05$ , \*\*  $p \leq 0.01$ ; n=6. (D) FLT3L present in serum of C57BL6 treated with radiation therapy, anti-CD25, and anti-CD137, and DEREK mice treated with radiation therapy, anti-CD25, anti-CD137, and diphtheria toxin (DT); \*\*  $p \leq 0.01$ ; n=6.
