# Supplementary material
Source: PubMed Central journal article supplement (PMC8595694)
Supplement: NIHMS1741128-supplement-6.pdf [file NIHMS1741128-supplement-6.pdf]

Supplementary Figure 6

A

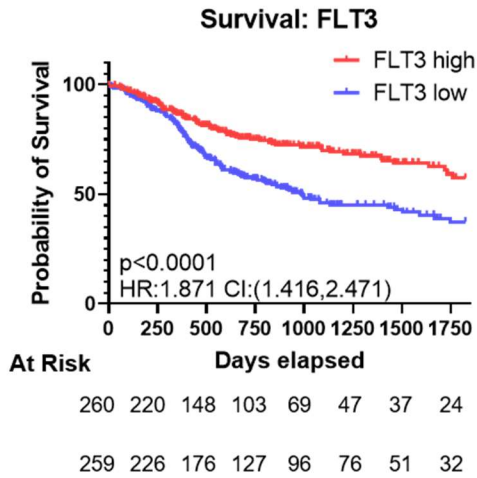

B

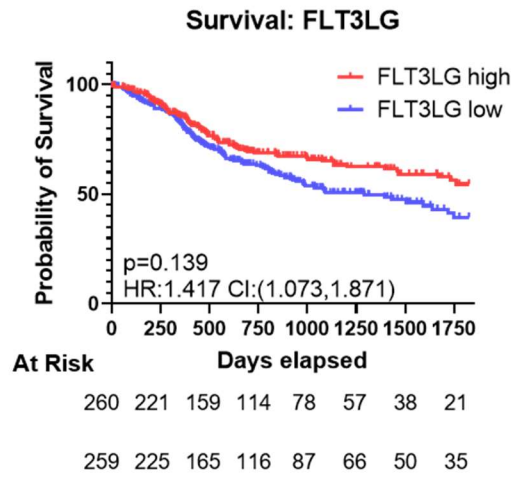

**Supplementary Figure 6**

(A) Survival curve comparing patients with high expression of FLT3, the FLT3LG receptor, to patients with low expression of FLT3 expression. (B) Survival curve comparing patients with high expression of FLT3LG to patients with low expression of FLT3LG.
